# Supplementary material for: Formulating Assessment Criteria for Filiform Needle Manipulation Techniques: An e-Delphi Study
Source: Research Square preprint supplement (doi:10.21203/rs.3.rs-6860586/v1), 2025-10-15
Supplement: Supplementary file 1 [file 3066b52fd14cd00fc2ea82e6.docx]

**Additional file 5**

Results of Questionnaire Scores (Delphi Round 2)

| Items | Mean±SD | CV（%） | Full score rate |
| --- | --- | --- | --- |
| 1 Terms and definitions | 5.00±0.00 | 0.00 | 100% |
| 1-1 Needling hand | 4.96±0.20 | 3.95 | 96.15% |
| 1-2 Pressing hand | 4.88±0.33 | 6.68 | 88.46% |
| 1-3 Needling methods | 4.92±0.27 | 5.52 | 92.31% |
| 1-4 Acupoints | 4.96±0.20 | 3.95 | 96.15% |
| 1-5 “Deqi” | 4.92±0.27 | 5.52 | 92.31% |
| 1-6 “Cun” | 4.81±0.40 | 8.36 | 80.77% |
| 1-7 Syncope during acupuncture | 4.92±0.27 | 5.52 | 92.31% |
| 1-8 Stuck needle | 4.92±0.27 | 5.52 | 92.31% |
| 1-9 Body position | 4.85±0.37 | 7.59 | 84.62% |
| 1-10 Reinforcing and reducing method | 4.88±0.33 | 6.68 | 88.46% |
| 2 Examiner | 5.00±0.00 | 0.00 | 100.00% |
| 2-1 Number of examiners | 4.81±0.40 | 8.36 | 80.77% |
| 2-2 Qualification of Examiners | 5.00±0.00 | 0.00 | 100.00% |
| 2-2-1 Examiner’s degree | 4.85±0.37 | 7.59 | 84.62% |
| 2-2-2 Working seniority | 4.88±0.33 | 6.68 | 88.46% |
| 2-3 Examiner's dress code | 4.85±0.37 | 7.59 | 84.62% |
| 2-4 Examiner's duties | 4.92±0.27 | 5.52 | 92.31% |
| 2-5 Circumstances of recusal | 4.92±0.27 | 5.52 | 92.31% |
| 3 Examination room | 5.00±0.00 | 0.00 | 100.00% |
| 3-1 Examination room environment (including room size, temperature, humidity, light, sound) | 4.88±0.33 | 6.68 | 88.46% |
| 3-2 Examination room area and function | 4.85±0.37 | 7.59 | 84.62% |
| 3-3 Examination room equipment | 4.85±0.37 | 7.59 | 84.62% |
| 4 Examinee | 5.00±0.00 | 0.00 | 100.00% |
| 4-1 Basic requirements | 4.85±0.37 | 7.59 | 84.62% |
| 4-2 Dressing code | 4.77±0.43 | 9.01 | 76.92% |
| 5 Length of examination | 5.00±0.00 | 0.00 | 100.00% |
| 5-1 Total time | 4.81±0.40 | 8.36 | 80.77% |
| 5-2 Time of evaluation | 4.88±0.33 | 6.68 | 88.46% |
| 6 Operation process and requirements | 5.00±0.00 | 0.00 | 100.00% |
| 6-1 Evaluation before acupuncture | 5.00±0.00 | 0.00 | 100.00% |
| 6-1-1 Basic patient status (basic information, medical history, mental, emotional and dietary status) | 4.92±0.27 | 5.52 | 92.31% |
| 6-1-2 Skin condition of the acupuncture site | 4.92±0.27 | 5.52 | 92.31% |
| 6-1-3 Explain the acupuncture process and assess the degree of patient cooperation | 4.88±0.33 | 6.68 | 88.46% |
| 6-2 Preparation before acupuncture | 5.00±0.00 | 0.00 | 10.000% |
| 6-2-1 Check spare parts | 4.92±0.27 | 5.52 | 92.31% |
| 6-2-2 Pre-acupuncture humanistic concern | 4.96±0.20 | 3.95 | 96.15% |
| 6-2-3 Hand disinfection | 4.96±0.20 | 3.95 | 96.15% |
| 6-2-4 Check patient information | 4.92±0.27 | 5.52 | 92.31% |
| 6-3 Acupuncture implementation | 5.00±0.00 | 0.00 | 100.00% |
| 6-3-1 Select the position | 4.96±0.20 | 3.95 | 96.15% |
| 6-3-2Acupoint positioning | 4.96±0.20 | 3.95 | 96.15% |
| 6-3-3 Local disinfection of acupoints | 4.92±0.27 | 5.52 | 92.31% |
| 6-3-4 Needle insertion technique | 4.85±0.37 | 7.59 | 84.62% |
| 6-3-5 Retaining the needle | 4.81±0.40 | 8.36 | 80.77% |
| 6-3-6 Withdraw the needle | 4.88±0.33 | 6.68 | 88.46% |
| 6-3-7 Post-acupuncture humanistic concern | 4.85±0.37 | 7.59 | 84.62% |
| 6-3-8 Organizational tools | 5.00±0.00 | 0.00 | 100.00% |
| 7 Questions from the floor | 5.00±0.00 | 0.00 | 100.00% |
| 7-1 Precautions for acupuncture | 4.92±0.27 | 5.52 | 92.31% |
| 7-2 Treatment of needling accidents | 4.92±0.27 | 5.52 | 92.31% |
| 7-3 Angle and depth of the needle | 4.96±0.20 | 3.95 | 96.15% |
| 7-4 Acupuncture technique of tonification and diarrhea | 4.88±0.33 | 6.68 | 88.46% |
| 8 Evaluation | 5.00±0.00 | 0.00 | 100.00% |
| 8-1 Evaluation criteria (evaluation scale) | 4.81±0.40 | 8.36 | 80.77% |
| 8-2 Scoring method | 4.88±0.33 | 6.68 | 88.46% |
| 8-3 Criteria for passing the examination | 4.85±0.37 | 7.59 | 84.62% |
