# Supplementary material for: Formulating Assessment Criteria for Filiform Needle Manipulation Techniques: An e-Delphi Study
Source: Research Square preprint supplement (doi:10.21203/rs.3.rs-6860586/v1), 2025-10-15
Supplement: Supplementary file 2 [file 5dca1f6d632ee719865986f3.docx]

**Additional file 2 Contents of the third and fourth rounds of questionnaires**

***Acupuncture Technical Operation Assessment Standard: Filiform Needles***

**Expert Consultation Survey**

Dear experts:

Through the first two rounds of Delphi surveys, the framework we developed has reached expert consensus (the details have been sent to you by email). The research team initially formulated implementation plans for each phase by reviewing literature, conducting international research, and drawing on teaching assessment experience. However, certain decision-making challenges still require expert input. This questionnaire specifically seeks opinions from experts regarding specific requirements such as examiners' qualifications, assessment formats, and scoring methodologies.

We sincerely look forward to your valuable advice and appreciate your support and cooperation.

Wish you all the best in your work and a happy life!

**Part one: Basic Information of Experts**

1.The Familiarity of Experts with the Consulting Content

| Content classification | Familiarity | | | | |
| --- | --- | --- | --- | --- | --- |
| Extremely familiar | Relatively familiar | Generally familiar | Less familiar | Unfamiliar |
| Mauipulation of acupuncture | □ | □ | □ | □ | □ |
| Technical assessment of acupuncture | □ | □ | □ | □ | □ |
| Acupuncture teaching | □ | □ | □ | □ | □ |

Explanation: Please mark "√" in the corresponding space according to the actual situation.

2.The judgment basis of experts

| Judgment basis | Expert self-evaluation (based on degree) | | |
| --- | --- | --- | --- |
| More | Average | Less |
| Rational analysis | □ | □ | □ |
| Practical experience | □ | □ | □ |
| Understand the current situation both domestically and internationally | □ | □ | □ |
| Intuitive perception | □ | □ | □ |
| References documentation | □ | □ | □ |

Explanation: Please mark "√" in the corresponding space according to the actual situation.

**Part two: Investigation on the recommended level of the assessment of filiform needle manipulation techniques.**

Instructions for filling in the form:

Based on the existing information, we have summarized several design schemes of the following links and set them as options. Please read the following options carefully and check the ones you recommend with "√". If you have more recommended assessment schemes, please list them in the column of "Supplementary Suggestions".

| **1.Examiner's degree** | | | | |
| --- | --- | --- | --- | --- |
| □ | | | | Examiners are required to obtain a bachelor’s degree |
| □ | | | | Examiners are required to obtain a postgraduate degree |
| □ | | | | No requirements for the educational qulifications of the examiners |
| Supplementary suggestions： | | | | |
| **2.Examiner's clinical working years of acupuncture** | | | | |
| □ | | | | Examiners are required to have been engaged in acupuncture clinical work for more than 5 years |
| □ | | | | Examiners are required to have been engaged in acupuncture clinical work for more than 10 years |
| □ | | | | No requirements for the examiners' clinical working years of acupuncture |
| Supplementary suggestions： | | | | |
| **3.Examiner's positional titles** | | | | |
| □ | | Examiners are required to hold the title of associate professor or above | | |
| □ | | No requirements for the examiner's professional title | | |
| Supplementary suggestions： | | | | |
| **4.Number of examiners** | | | | |
| □ | | Three examiners participated in the scoring | | |
| □ | | Five examiners participated in the scoring | | |
| Supplementary suggestions： | | | | |
| **5.Needle selection** | | | | |
| □ | | Disposably medical acupuncture needle | | |
| □ | | Disposably medical needle sleeve | | |
| Supplementary suggestions： | | | | |
| **6.Needle specifications** | | | | |
| □ 0.25×25mm □ 0.30×25mm □ 0.25×40mm □ 0.30×40mm | | | | |
| Supplementary suggestions： | | | | |
| **7.Examinee registration requirements** | | | | |
| □ | Complete theoretical and practical courses of acupuncture(at least 36 lessons), and voluntary registration | | | |
| □ | Have basic knowledge of clinical medicine or traditional Chinese medicine, have been engaged in clinical work of acupuncture for more than 2 years, voluntary registration | | | |
| Supplementary suggestions： | | | | |
| **8.Presentation form of exam information** | | | | |
| □ | | | Inscription provides basic information of the patient | |
| □ | | | On site consultation,answered by the examiner or patient | |
| Supplementary suggestions： | | | | |

| **9.Needling object** | |
| --- | --- |
| □ Simulated skin needle package | □ Standardized patients |
| □ Medical manikin | □ Two examinees exchange medical and patient identities |
| Supplementary suggestions： | |
| **10.Acupoints and positioning** | |
| □ Take *WHO International Standard of Acupuncture Points* as the standard | |
| □ Take the current acupuncture textbooks of various countries as the standard | |
| Supplementary suggestions： | |
| **11.Content of examination** | |
| □ The assessment covers one acupoint each for the head, chest and abdomen, waist and back, and limbs | |
| □ The assessment content only includes acupoints in one part of the head, chest and abdomen, waist and back, and limbs | |
| Supplementary suggestions： | |

| **12.Assessment of acupoints** | **Assessment of head acupoints: Baihui acupoint (DU20) and Yintang acupoint (EX-HN3)** | | | | | | | |
| --- | --- | --- | --- | --- | --- | --- | --- | --- |
| □ Highly recommended | | | □ Recommended | □ Generally recommended | □ Less recommended | □ Not recommended | |
| **Assessment of chest and abdomen acupoints: Zhongwan acupoint (RN12) and Tianshu acupoint(ST25)** | | | | | | | |
| □ Highly recommended | | | □ Recommended | □ Generally recommended | □ Less recommended | | □ Not recommended |
| **Assessment of waist and back acupoints:Shenshu acupoint(BL23) and Mingmen acupoint(DU4)** | | | | | | | |
| □ Highly recommended | | □ Recommended | | □ Generally recommended | □ Less recommended | | □ Not recommended |
| **Assessment of upper limbs acupoints: Quchi acupoint(LI11) and Hegu acupoint(LI4)** | | | | | | | |
| □ Highly recommended | □ Recommended | | | □ Generally recommended | □ Less recommended | | □ Not recommended |
| **Assessment of lower limbs acupoints: Zusanli acupoint(ST36)and Sanyinjiao acupoint(SP6)** | | | | | | | |
| □ Highly recommended | | | □ Recommended | □ Generally recommended | □ Less recommended | □ Not recommended | |
| Supplementary suggestions： | | | | | | | | |

| **13.Selection of disinfection products** | | | | |
| --- | --- | --- | --- | --- |
| □ | Use 75% alcohol cotton balls to apply to the skin at the acpuncture site | | | |
| □ | Use iodine cotton balls to apply to theskin at the acupuncture site | | | |
| Supplementary suggestions： | | | | |
| **14.The standard of manipulation** | | | | |
| □ | Use *ISO/TS16843-2* as the standard of manipulation | | | |
| □ | Collect experts’ consensus of acupuncture from various countries as the standard of manipulation | | | |
| □ | Take the current acupuncture textbooks of various countries or relevant documents as the standard of manipulation | | | |
| Supplementary suggestions： | | | | |
| **15.The way to judge“deqi”** | | | | |
| □ | The patient report whether they have any symptoms such as soreness, numbness, bloating, or heaviness | | | |
| □ | The manipulation is proficient and the method is correct | | | |
| □ | Make a judgment based on the above two situations | | | |
| □ | The examinee only describes the standard of “*deqi*” | | | |
| Supplementary suggestions： | | | | |
| **16.Assessment types of questions related to acupuncture [Multiple choice]** | | | | |
| □ | Precautions for acupuncture | | | |
| □ | Acupuncture accidents treatment | | | |
| □ | Angle and depth of acupuncture | | | |
| Supplementary suggestions： | | | | |
| **17.Total assessment time** | | | | |
| □ 10min | | □ 15min | □ 20min | □ 25min |
| Supplementary suggestions： | | | | |
| **18.Scoring criteria** | | | | |
| □ | Each examiner scores individually and takes the average score, which is recorded as the total score of the examinee. A score of 60 or above is considered a pass in the exam. | | | |
| □ | Each examiner scores individually and takes the average score, which is recorded as the total score of the examinee. The evaluation is based on five levels: excellent (90-100 points), good (80-89 points), moderate(70-79 points), qualified (60-69 points),and unqualified (below 59 points) | | | |
| Supplementary suggestions： | | | | |

Do you have any other assessment steps and suggestions about the assessment of filiform needle manipulation technique? [Fill in the blank]

Do you have any other suggestions about the content of examination questions? [Fill in the blank]

In addition to the acupoints mentioned in the questionnaire, do you have any other acupoints recommended for assessment?[Fill in the blank]

Thank you for taking time to participate in the Delphi survey. Thank you for filling it seriously. Wish you all the best in your work!

***Acupuncture Technical Operation Assessment Standard: Filiform Needles***

**Expert Consultation Survey**

Dear experts:

We appreciate your participation in the consultation questionnaire for the development of the international standard of Acupuncture Technical Operation Assessment Standard: Filiform Needles. By analyzing the results of the first round of the questionnaire, we have retained the options with ≥75% consistency, deleted the options with ≤25% consistency, and added some of the experts' suggestions in the supplementary comments column to the options after discussion, and made changes and adjustments on the whole. The link below is to the current round of questionnaires, consulting on the elements on which opinions were not agreed.Please give us your valuable opinions again, taking into account your work experience and the feedback we have provided on the results! Thank you for your support!

**Investigation on the recommended level of the assessment of filiform needle manipulation techniques.**

Please read the following options carefully and check the ones you recommend with "√". If you have more recommended assessment schemes, please list them in the column of "Supplementary Suggestions". ( Percentages after options are the results of the first round of questionnaires.)

**1. Examiner’s degree**

| □ Examiners are required to obtain a bachelor’s degree (Acupuncture-related major)[26.08%] |
| --- |
| □ Examiners are required to obtain a postgraduate degree (Direction of acupuncture)[69.23%] |

**2. Examiner's clinical working years of acupuncture**

| □ Examiners are required to have been engaged in acupuncture clinical work or acupuncture education for more than 5 years.[42.31%] |
| --- |
| □ Examiners are required to have been engaged in acupuncture clinical work or acupuncture education for more than 10 years.[57.69%] |

**3. Number of examiners**

| □ Three examiners participated in the scoring.[69.23%] |
| --- |
| □ Five examiners participated in the scoring.[30.77%] |

**4. Examinee registration requirements**

| □ Complete theoretical and practical courses of acupuncture (at least 36 lessons), and voluntary registration.[46.15%] |
| --- |
| □ Have basic knowledge of clinical medicine or traditional Chinese medicine, have been engaged in clinical work of acupuncture for more than 2 years, voluntary registration.[53.85%] |

**5. Presentation form of exam information**

| □ Inscription provides basic information of the patient.[65.38%] |
| --- |
| □ On site consultation, answered by the examiner or patient.[34.62%] |

**6. Needling object**

| □ Standardized patients.[38.46%] |
| --- |
| □ Two examinees exchange medical and patient identities.[34.62%] |

**7. Assessment of head acupoints (Please select the two most recommended)**

| □ Baihui (DU20) |
| --- |
| □ Yintang (EX-HN3) |
| □ Fengchi (GB20) |
| □ Taiyang (EX-HN5) |

**8. Assessment of chest and abdomen acupoints (Please select the two most recommended)**

| □ Zhongwan (RN12) |
| --- |
| □ Tianshu (ST25) |
| □ Guanyuan (RN4) |
| □ Danzhong (RN17) |

**9. Assessment of waist and back acupoints (Please select the two most recommended)**

| □ Shenshu (BL23) |
| --- |
| □ Yaoyangguan (DU3) |
| □ Geshu (BL17) |
| □ Dazhui (DU14) |

**10. Assessment of upper limbs acupoints (Please select the two most recommended)**

| □ Quchi (LI11) |
| --- |
| □ Hegu (LI4) |
| □ Neiguan (PC6) |
| □ Lieque (LU7) |

**11. Assessment of lower limbs acupoints (Please select the two most recommended)**

| □ Zusanli (ST36) |
| --- |
| □ Sanyinjiao (SP6) |
| □ Yanglingquan (GB34) |
| □ Weizhong (BL40) |
| □ Yinlingquan (SP9) |
| □ Gongsun (SP4) |
| □ Taichong (LR3) |

**12. The way to judge “deqi”**

| □ The patient report whether they have any symptoms such as soreness, numbness, bloating, or heaviness.[19.23%] |
| --- |
| □ The manipulation is proficient and the method is correct.[23.08%] |
| □ Make a judgment based on the above two situations.[50%] |
| □ The examinee only describes the standard of “*deqi*”. [7.69%] |

**13. Total assessment time**

| □ 10min[30.77%] |
| --- |
| □ 20min[34.62%] |

**14. Scoring criteria**

| □ Each examiner scores individually and takes the average score, which is recorded as the total score of the examinee. A score of 60 or above is considered a pass in the exam.[38.46%] |
| --- |
| □ Each examiner scores individually and takes the average score, which is recorded as the total score of the examinee. The evaluation is based on five levels: excellent (90-100 points), good (80-89 points), moderate(70-79 points), qualified (60-69 points),and unqualified (below 59 points).[61.54%] |

Thank you for taking time to participate in the Delphi survey. Thank you for filling it seriously. Wish you all the best in your work!
