# Supplementary material for: Formulating Assessment Criteria for Filiform Needle Manipulation Techniques: An e-Delphi Study
Source: Research Square preprint supplement (doi:10.21203/rs.3.rs-6860586/v1), 2025-10-15
Supplement: Supplementary file 3 [file 7105aae9fc18e9a63907e36b.docx]

**Additional file 1 Contents of the first and second rounds of questionnaires**

***Acupuncture Technical Operation Assessment Standard: Filiform Needles***

**Expert Consultation Survey**

Thank you very much for taking time to participate in this expert opinion consultation and survey. We are the staff of the World Federation of Acupuncture-Moxibustion Societies ,who are working on the formulation of the standard project of *Acupuncture Technical Operation Assessment Standard: Filiform Needles.* We have learned thatyou have affluent experience and unique insights in the research of filiform needling methods and the assessment of acupuncture and moxibustion techniques. Therefore, your rich work experience and profound professional background are crucial for the development of this project. Please allow me to briefly report the main research contents to you:

With the increasing number of acupuncture learners and practitioners around the world, the assessment and process standards of filiform needling operation technology need to be unified.This project plans to develop a standard for reference in most countries around the world to test the learning effect of students and define the industry access standards.We have drawn up a draft through extensive literature review and international research in the early stage. This questionnaire mainly seeks for your advice on the relevant settings in some aspects of the assessment process, in order to guide us to further revise and improve.

Please kindly reply to the inquiry form within two weeks after receiving the email and offer your valuable suggestions without hesitation.If you have any questions, please send an email to WFAS.SC@outlook.com. Due to the needs of the research, the content related to personal information in the questionnaire is only used for research and analysis, and is of no other use.

We sincerely look forward to your valuable advice and appreciate your support and cooperation.

Wish you all the best in your work and a happy life!

**Part one: Basic Information of Experts**

1.General Situation

| Name |  | Age(years) |  |
| --- | --- | --- | --- |
| Country and region |  | Work unit |  |
| Major/Research field |  | Education/Degree |  |
| Professional title |  | Work experience (years) |  |
| Working field |  | | |
| Phone |  | E-mail |  |

Explanation: Please fill in the corresponding spaces according to the actual situation。

2.The Familiarity of Experts with the Consulting Content

| Content classification | Familiarity | | | | |
| --- | --- | --- | --- | --- | --- |
| Extremely familiar | Relatively familiar | Generally familiar | Less familiar | Unfamiliar |
| Mauipulation of acupuncture | □ | □ | □ | □ | □ |
| Technical assessment of acupuncture | □ | □ | □ | □ | □ |
| Acupuncture teaching | □ | □ | □ | □ | □ |

Explanation: Please mark "√" in the corresponding space according to the actual situation.

3.The judgment basis of experts

| Judgment basis | Expert self-evaluation (based on degree) | | |
| --- | --- | --- | --- |
| More | Average | Less |
| Rational analysis | □ | □ | □ |
| Practical experience | □ | □ | □ |
| Understand the current situation both domestically and internationally | □ | □ | □ |
| Intuitive perception | □ | □ | □ |
| References documentation | □ | □ | □ |

Explanation: Please mark "√" in the corresponding space according to the actual situation.

**Part two: Assign importance score to each item of assessment criteria.**

**Instructions for filling in the form:**

Please evaluate the importance of the items on the left in the "Importance Evaluation" section. The numbers 1, 2, 3, 4, and 5 represent "Very Unimportant", "Not Important", "Average", "Important", and "Very Important" respectively. Please check the corresponding number with a checkmark based on your judgment. If you have any additional recommendations, please list them in the "Supplementary Suggestions" section.

| **Items** | **Importance evaluation** | **Supplementary** |
| --- | --- | --- |
| 1 Terms and definitions | □ 1 □2 □ 3 □ 4 □ 5 |  |
| 1-1 Needling hand | □ 1 □2 □ 3 □ 4 □ 5 |  |
| 1-2 Pressing hand | □ 1 □2 □ 3 □ 4 □ 5 |  |
| 1-3 Needling methods | □ 1 □2 □ 3 □ 4 □ 5 |  |
| 1-4 Acupoints | □ 1 □2 □ 3 □ 4 □ 5 |  |
| 1-5 “Deqi” | □ 1 □2 □ 3 □ 4 □ 5 |  |
| 2 Examiner | □ 1 □2 □ 3 □ 4 □ 5 |  |
| 2-1 Number of examiners | □ 1 □2 □ 3 □ 4 □ 5 |  |
| 2-2 Qualification of Examiners | □ 1 □2 □ 3 □ 4 □ 5 |  |
| 2-2-1 Examiner’s degree | □ 1 □2 □ 3 □ 4 □ 5 |  |
| 2-2-2 Working seniority | □ 1 □2 □ 3 □ 4 □ 5 |  |
| 2-3 Requirements for examiners | □ 1 □2 □ 3 □ 4 □ 5 |  |
| 2-3-1 Dressing code | □ 1 □2 □ 3 □ 4 □ 5 |  |
| 2-3-2 Language | □ 1 □2 □ 3 □ 4 □ 5 |  |
| 2-4 Examiner's duties | □ 1 □2 □ 3 □ 4 □ 5 |  |
| 2-5 Circumstances of recusal | □ 1 □2 □ 3 □ 4 □ 5 |  |
| 3 Examination room | □ 1 □2 □ 3 □ 4 □ 5 |  |
| 3-1 Examination room area | □ 1 □2 □ 3 □ 4 □ 5 |  |
| 3-2 Examination room division and function | □ 1 □2 □ 3 □ 4 □ 5 |  |
| 3-3 Examination room environment (temperature, humidity, light, sound) | □ 1 □2 □ 3 □ 4 □ 5 |  |
| 3-4 Examination room equipment | □ 1 □2 □ 3 □ 4 □ 5 |  |
| 3-5 Examination room layout | □ 1 □2 □ 3 □ 4 □ 5 |  |
| 4 Examinee | □ 1 □2 □ 3 □ 4 □ 5 |  |
| 4-1 Basic requirements | □ 1 □2 □ 3 □ 4 □ 5 |  |
| 4-2 Dressing code | □ 1 □2 □ 3 □ 4 □ 5 |  |
| 4-3 Language | □ 1 □2 □ 3 □ 4 □ 5 |  |
| 5 Length of examination | □ 1 □2 □ 3 □ 4 □ 5 |  |
| 5-1 Total time | □ 1 □2 □ 3 □ 4 □ 5 |  |
| 5-2 Time of evaluation | □ 1 □2 □ 3 □ 4 □ 5 |  |
| 6 Operation process and requirements | □ 1 □2 □ 3 □ 4 □ 5 |  |
| 6-1 Evaluation before acupuncture | □ 1 □2 □ 3 □ 4 □ 5 |  |
| 6-1-1 Patient's basic condition | □ 1 □2 □ 3 □ 4 □ 5 |  |
| 6-1-2 Skin condition of the acupuncture site | □ 1 □2 □ 3 □ 4 □ 5 |  |
| 6-1-3 Patient's mental state | □ 1 □2 □ 3 □ 4 □ 5 |  |
| 6-2 Preparation before acupuncture | □ 1 □2 □ 3 □ 4 □ 5 |  |
| 6-2-1 Check spare parts | □ 1 □2 □ 3 □ 4 □ 5 |  |
| 6-2-2 Explain the work to the patient and check the patient's name | □ 1 □2 □ 3 □ 4 □ 5 |  |
| 6-2-3 Hand disinfection | □ 1 □2 □ 3 □ 4 □ 5 |  |
| 6-3 Acupuncture implementation | □ 1 □2 □ 3 □ 4 □ 5 |  |
| 6-3-1 Select the position | □ 1 □2 □ 3 □ 4 □ 5 |  |
| 6-3-2 Acupoint positioning | □ 1 □2 □ 3 □ 4 □ 5 |  |
| 6-3-3 Local disinfection of acupoints | □ 1 □2 □ 3 □ 4 □ 5 |  |
| 6-3-4 Needle insertion technique | □ 1 □2 □ 3 □ 4 □ 5 |  |
| 6-3-5 Retaining the needle | □ 1 □2 □ 3 □ 4 □ 5 |  |
| 6-3-6 Withdraw the needle | □ 1 □2 □ 3 □ 4 □ 5 |  |
| 6-3-7 Check supplies and clean up medical waste | □ 1 □2 □ 3 □ 4 □ 5 |  |
| 6-3-8 Humanistic concern | □ 1 □2 □ 3 □ 4 □ 5 |  |
| 7 Questions from the floor | □ 1 □2 □ 3 □ 4 □ 5 |  |
| 7-1 Precautions for acupuncture | □ 1 □2 □ 3 □ 4 □ 5 |  |
| 7-2 Treatment of needling accidents | □ 1 □2 □ 3 □ 4 □ 5 |  |
| 7-3 Angle and depth of the needle | □ 1 □2 □ 3 □ 4 □ 5 |  |
| 8 Evaluation | □ 1 □2 □ 3 □ 4 □ 5 |  |
| 8-1 Evaluation criteria (evaluation scale) | □ 1 □2 □ 3 □ 4 □ 5 |  |
| 8-2 Evaluation methods | □ 1 □2 □ 3 □ 4 □ 5 |  |
| 8-3 Criteria for passing the examination | □ 1 □2 □ 3 □ 4 □ 5 |  |

Do you have any other ideas for the item framework for this assessment criteria?

What are the requirements for the practice standards of acupuncture doctors in your country or region?

Thank you for taking time to participate in the Delphi survey. Thank you for filling it seriously. Wish you all the best in your work!

***Acupuncture Technical Operation Assessment Standard: Filiform Needles***

**Expert Consultation Survey**

Thank you very much for taking time out of your busy schedule to participate in this consultation. We have received your first questionnaire feedback and incorporated your suggestions into the statistics. All expert evaluation results have been compiled into an anonymous statistical table and sent to your email address. This questionnaire has been revised based on experts' feedback. Please reassess the importance of each item and provide your ratings again.

**Instructions for filling in the form:**

Please evaluate the importance of the items on the left in the "Importance Evaluation" section. The numbers 1, 2, 3, 4, and 5 represent "Very Unimportant", "Not Important", "Average", "Important", and "Very Important" respectively. Please check the corresponding number with a checkmark based on your judgment. If you have any additional recommendations, please list them in the "Supplementary Suggestions" section.

| **Items** | **Importance evaluation** | **Supplementary** |
| --- | --- | --- |
| 1 Terms and definitions | □ 1 □2 □ 3 □ 4 □ 5 |  |
| 1-1 Needling hand | □ 1 □2 □ 3 □ 4 □ 5 |  |
| 1-2 Pressing hand | □ 1 □2 □ 3 □ 4 □ 5 |  |
| 1-3 Needling methods | □ 1 □2 □ 3 □ 4 □ 5 |  |
| 1-4 Acupoints | □ 1 □2 □ 3 □ 4 □ 5 |  |
| 1-5 “Deqi” | □ 1 □2 □ 3 □ 4 □ 5 |  |
| 1-6 “Cun” | □ 1 □2 □ 3 □ 4 □ 5 |  |
| 1-7 Syncope during acupuncture | □ 1 □2 □ 3 □ 4 □ 5 |  |
| 1-8 Stuck needle | □ 1 □2 □ 3 □ 4 □ 5 |  |
| 1-9 Body position | □ 1 □2 □ 3 □ 4 □ 5 |  |
| 1-10 Reinforcing and reducing method | □ 1 □2 □ 3 □ 4 □ 5 |  |
| 2 Examiner | □ 1 □2 □ 3 □ 4 □ 5 |  |
| 2-1 Number of examiners | □ 1 □2 □ 3 □ 4 □ 5 |  |
| 2-2 Qualification of Examiners | □ 1 □2 □ 3 □ 4 □ 5 |  |
| 2-2-1 Examiner’s degree | □ 1 □2 □ 3 □ 4 □ 5 |  |
| 2-2-2 Working seniority | □ 1 □2 □ 3 □ 4 □ 5 |  |
| 2-3 Examiner's dress code | □ 1 □2 □ 3 □ 4 □ 5 |  |
| 2-4 Examiner's duties | □ 1 □2 □ 3 □ 4 □ 5 |  |
| 2-5 Circumstances of recusal | □ 1 □2 □ 3 □ 4 □ 5 |  |
| 3 Examination room | □ 1 □2 □ 3 □ 4 □ 5 |  |
| 3-1 Examination room environment (including room size, temperature, humidity, light, sound) | □ 1 □2 □ 3 □ 4 □ 5 |  |
| 3-2 Examination room area and function | □ 1 □2 □ 3 □ 4 □ 5 |  |
| 3-3 Examination room equipment | □ 1 □2 □ 3 □ 4 □ 5 |  |
| 4 Examinee | □ 1 □2 □ 3 □ 4 □ 5 |  |
| 4-1 Basic requirements | □ 1 □2 □ 3 □ 4 □ 5 |  |
| 4-2 Dressing code | □ 1 □2 □ 3 □ 4 □ 5 |  |
| 5 Length of examination | □ 1 □2 □ 3 □ 4 □ 5 |  |
| 5-1 Total time | □ 1 □2 □ 3 □ 4 □ 5 |  |
| 5-2 Time of evaluation | □ 1 □2 □ 3 □ 4 □ 5 |  |
| 6 Operation process and requirements | □ 1 □2 □ 3 □ 4 □ 5 |  |
| 6-1 Evaluation before acupuncture | □ 1 □2 □ 3 □ 4 □ 5 |  |
| 6-1-1 Basic patient status (basic information, medical history, mental, emotional and dietary status) | □ 1 □2 □ 3 □ 4 □ 5 |  |
| 6-1-2 Skin condition of the acupuncture site | □ 1 □2 □ 3 □ 4 □ 5 |  |
| 6-1-3 Explain the acupuncture process and assess the degree of patient cooperation | □ 1 □2 □ 3 □ 4 □ 5 |  |
| 6-2 Preparation before acupuncture | □ 1 □2 □ 3 □ 4 □ 5 |  |
| 6-2-1 Check spare parts | □ 1 □2 □ 3 □ 4 □ 5 |  |
| 6-2-2 Pre-acupuncture humanistic concern | □ 1 □2 □ 3 □ 4 □ 5 |  |
| 6-2-3 Hand disinfection | □ 1 □2 □ 3 □ 4 □ 5 |  |
| 6-2-4 Check patient information | □ 1 □2 □ 3 □ 4 □ 5 |  |
| 6-3 Acupuncture implementation | □ 1 □2 □ 3 □ 4 □ 5 |  |
| 6-3-1 Select the position | □ 1 □2 □ 3 □ 4 □ 5 |  |
| 6-3-2Acupoint positioning | □ 1 □2 □ 3 □ 4 □ 5 |  |
| 6-3-3 Local disinfection of acupoints | □ 1 □2 □ 3 □ 4 □ 5 |  |
| 6-3-4 Needle insertion technique | □ 1 □2 □ 3 □ 4 □ 5 |  |
| 6-3-5 Retaining the needle | □ 1 □2 □ 3 □ 4 □ 5 |  |
| 6-3-6 Withdraw the needle | □ 1 □2 □ 3 □ 4 □ 5 |  |
| 6-3-7 Post-acupuncture humanistic concern | □ 1 □2 □ 3 □ 4 □ 5 |  |
| 6-3-8 Organizational tools | □ 1 □2 □ 3 □ 4 □ 5 |  |
| 7 Questions from the floor | □ 1 □2 □ 3 □ 4 □ 5 |  |
| 7-1 Precautions for acupuncture | □ 1 □2 □ 3 □ 4 □ 5 |  |
| 7-2 Treatment of needling accidents | □ 1 □2 □ 3 □ 4 □ 5 |  |
| 7-3 Angle and depth of the needle | □ 1 □2 □ 3 □ 4 □ 5 |  |
| 7-4 Acupuncture technique of tonification and diarrhea | □ 1 □2 □ 3 □ 4 □ 5 |  |
| 8 Evaluation | □ 1 □2 □ 3 □ 4 □ 5 |  |
| 8-1 Evaluation criteria (evaluation scale) | □ 1 □2 □ 3 □ 4 □ 5 |  |
| 8-2 Scoring method | □ 1 □2 □ 3 □ 4 □ 5 |  |
| 8-3 Criteria for passing the examination | □ 1 □2 □ 3 □ 4 □ 5 |  |

Thank you for taking time to participate in the Delphi survey. Thank you for filling it seriously. Wish you all the best in your work!
