# Supplementary material for: Formulating Assessment Criteria for Filiform Needle Manipulation Techniques: An e-Delphi Study
Source: Research Square preprint supplement (doi:10.21203/rs.3.rs-6860586/v1), 2025-10-15
Supplement: Supplementary file 4 [file e44269ff9ad8ffbc54327d46.docx]

**Additional file 4**

Results of Questionnaire Scores (Delphi Round 1)

| Items | Mean±SD | CV（%） | Full score rate |
| --- | --- | --- | --- |
| 1 Terms and definitions | 4.85±0.37 | 7.59 | 84.62% |
| 1-1 Needling hand | 4.73±0.53 | 11.28 | 76.92% |
| 1-2 Pressing hand | 4.77±0.51 | 10.79 | 80.77% |
| 1-3 Needling methods | 4.92±0.27 | 5.52 | 92.31% |
| 1-4 Acupoints | 4.73±0.53 | 11.28 | 76.92% |
| 1-5 “Deqi” | 4.73±0.45 | 9.56 | 73.08% |
| 2 Examiner | 4.88±0.43 | 8.83 | 92.31% |
| 2-1 Number of examiners | 4.88±0.43 | 8.83 | 92.31% |
| 2-2 Qualification of Examiners | 4.65±0.56 | 12.07 | 73.08% |
| 2-2-1 Examiner’s degree | 4.81±0.40 | 8.36 | 80.77% |
| 2-2-2 Working seniority | 4.96±0.20 | 3.95 | 96.15% |
| 2-3 Requirements for examiners | 4.69±0.47 | 10.03 | 73.08% |
| 2-3-1 Dressing code | 4.85±0.37 | 7.59 | 84.62% |
| 2-3-2 Language | 4.04±0.72 | 17.82 | 26.92% |
| 2-4 Examiner's duties | 4.88±0.33 | 6.67 | 88.46% |
| 2-5 Circumstances of recusal | 4.69±0.55 | 11.71 | 73.08% |
| 3 Examination room | 5.00±0.00 | 0.00 | 100.00% |
| 3-1 Examination room area | 4.42±0.58 | 13.07 | 46.15% |
| 3-2 Examination room division and function | 4.96±0.20 | 3.95 | 96.15% |
| 3-3 Examination room environment (temperature, humidity, light, sound) | 4.69±0.47 | 10.04 | 69.23% |
| 3-4 Examination room equipment | 4.96±0.20 | 3.95 | 96.15% |
| 3-5 Examination room layout | 4.73±0.53 | 11.28 | 76.92% |
| 4 Examinee | 4.88±0.43 | 8.83 | 92.31% |
| 4-1 Basic requirements | 4.96±0.20 | 3.95 | 96.15% |
| 4-2 Dressing code | 4.96±0.20 | 3.95 | 96.15% |
| 4-3 Language | 3.92±0.84 | 21.55 | 30.77% |
| 5 Length of examination | 5.00±0.00 | 0.00 | 100.00% |
| 5-1 Total time | 4.96±0.20 | 3.95 | 96.15% |
| 5-2 Time of evaluation | 4.62±0.64 | 13.79 | 69.23% |
| 6 Operation process and requirements | 5.00±0.00 | 0.00 | 100.00% |
| 6-1 Evaluation before acupuncture | 4.96±0.20 | 3.95 | 96.15% |
| 6-1-1 Patient's basic condition | 4.92±0.27 | 5.52 | 92.31% |
| 6-1-2 Skin condition of the acupuncture site | 4.92±0.39 | 7.97 | 96.15% |
| 6-1-3 Patient's mental state | 4.85±0.37 | 7.59 | 84.62% |
| 6-2 Preparation before acupuncture | 4.88±0.43 | 8.83 | 92.31% |
| 6-2-1 Check spare parts | 4.73±0.45 | 9.56 | 73.08% |
| 6-2-2 Explain the work to the patient and check the patient's name | 4.88±0.33 | 6.67 | 88.46% |
| 6-2-3 Hand disinfection | 4.73±0.53 | 11.28 | 76.92% |
| 6-3 Acupuncture implementation | 4.85±0.37 | 7.59 | 84.62% |
| 6-3-1 Select the position | 4.92±0.27 | 5.52 | 92.31% |
| 6-3-2 Acupoint positioning | 4.77±0.43 | 9.01 | 76.92% |
| 6-3-3 Local disinfection of acupoints | 4.88±0.33 | 6.67 | 88.46% |
| 6-3-4 Needle insertion technique | 4.81±0.49 | 10.22 | 84.62% |
| 6-3-5 Retaining the needle | 4.88±0.33 | 6.67 | 88.46% |
| 6-3-6 Withdraw the needle | 4.96±0.20 | 3.95 | 96.15% |
| 6-3-7 Check supplies and clean up medical waste | 4.92±0.27 | 5.52 | 92.31% |
| 6-3-8 Humanistic concern | 4.92±0.27 | 5.52 | 92.31% |
| 7 Questions from the floor | 4.92±0.27 | 5.52 | 92.31% |
| 7-1 Precautions for acupuncture | 4.85±0.46 | 9.58 | 88.46% |
| 7-2 Treatment of needling accidents | 4.88±0.33 | 6.67 | 88.46% |
| 7-3 Angle and depth of the needle | 4.81±0.40 | 8.36 | 80.77% |
| 8 Evaluation | 4.85±0.37 | 7.59 | 84.62% |
| 8-1 Evaluation criteria (evaluation scale) | 5.00±0.00 | 0.00 | 100.00% |
| 8-2 Evaluation methods | 4.88±0.33 | 6.67 | 88.46% |
| 8-3 Criteria for passing the examination | 4.92±0.27 | 5.52 | 92.31% |
