# Supplementary material for: Formulating Assessment Criteria for Filiform Needle Manipulation Techniques: An e-Delphi Study
Source: Research Square preprint supplement (doi:10.21203/rs.3.rs-6860586/v1), 2025-10-15
Supplement: Supplementary file 5 [file f0a8f79b355e9cb55e0fe214.docx]

**Additional file 3 Student opinions survey**

**Questionnaire Survey**

| Name |  | Age |  |
| --- | --- | --- | --- |
| Nationality |  | Institution |  |
| Education/Degree |  | Whether have basic knowledge of medicine |  |
| Acupuncture Study Duration |  | Whether have clinical experience in acupuncture |  |

**Please mark "√" in front of the item you choose.**

**1.Do you have any requirements for the examiners about the education background or the professional title?**

□YES □NO

**2.Do you have any requirements for examiner's clinical working years of acupuncture?**

□YES □NO

**3.How many examiners would you wish?**

□Three examiners □Five examiners

**4.What kind of needle would you wish to choose for the exam?**

□Disposably medical acupuncture needle

□Disposably medical needle sleeve

**5.Which presentation form of exam information would you prefer to accept?**

□Inscription provides basic information of the patient.

□On site consultation, answered by the examiner or patient.

**6.Which of the following methods would you prefer to perform the mauipulation of acupuncture?**

□Simulated skin needle package

□Standardized patients

□Medical manikin

□Two examinees exchange medical and patient identities

**7.How long for the assessment is more reasonable?**

□10min □15min □20min □25min

**8.Which of the following scoring criteria would you prefer to use?**

□Each examiner scores individually and takes the average score, which is recorded as the total score of the examinee. A score of 60 or above is considered a pass in the exam.

□Each examiner scores individually and takes the average score, which is recorded as the total score of the examinee. The evaluation is based on five levels: excellent (90-100 points), good (80-89 points), moderate(70-79 points), qualified (60-69 points),and unqualified (below 59 points).

**9.Supplementary suggestions**

|  |
| --- |

Date： Sign：______________
